# Supplementary material for: CircHMGCS1 Promotes Hepatoblastoma Cell Proliferation by Regulating the IGF Signaling Pathway and Glutaminolysis
Source: PubMed Central journal article supplement — Theranostics. 2019 Jan 25;9(3):900–19. doi: 10.7150/thno.29515 (PMC6376477; doi:10.7150/thno.29515), 2019-01-25
Supplement: thnov09p0900s1.pdf [file thnov09p0900s1.pdf]

## Supplementary Figures

Figure S1:

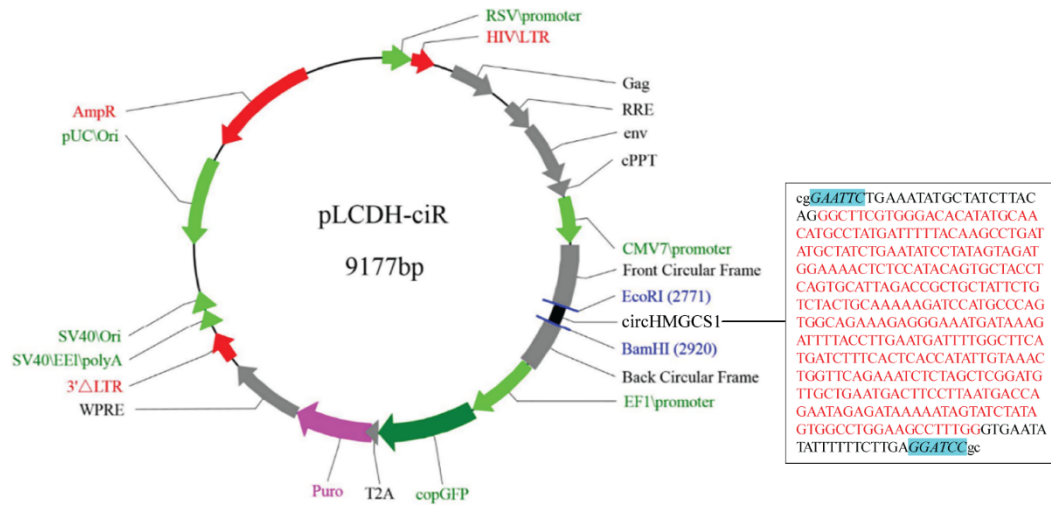

Figure S1: The profile of circHMGCS1 overexpression vector. CircHMGCS1 sequence was constructed into pLCDH-ciR vector.

Figure S2:

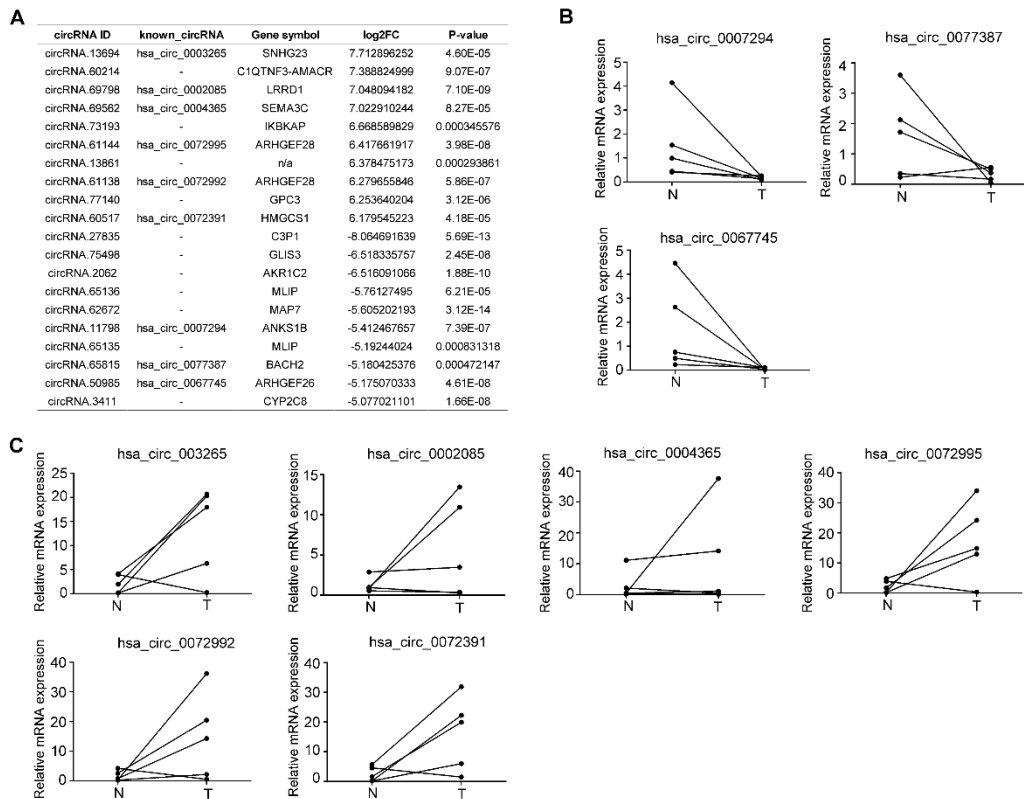

Figure S2. Validation of circRNA sequencing results by qRT-PCR of three downregulated known\_circRNA and six upregulated known\_circRNA in five paired HB samples. (A) The

top 10 upregulated circRNAs and the top 10 downregulated circRNAs. The log<sub>2</sub>FC of has\_circ\_0072391 is 6.179545223. (B) Expression of three downregulated known\_circRNA detected by qRT-PCR in five paired samples. (C) Expression of six upregulated known\_circRNA detected by qRT-PCR in five paired samples. Data from qRT-PCR are acquired from three independent experiments.

**Figure S3:**

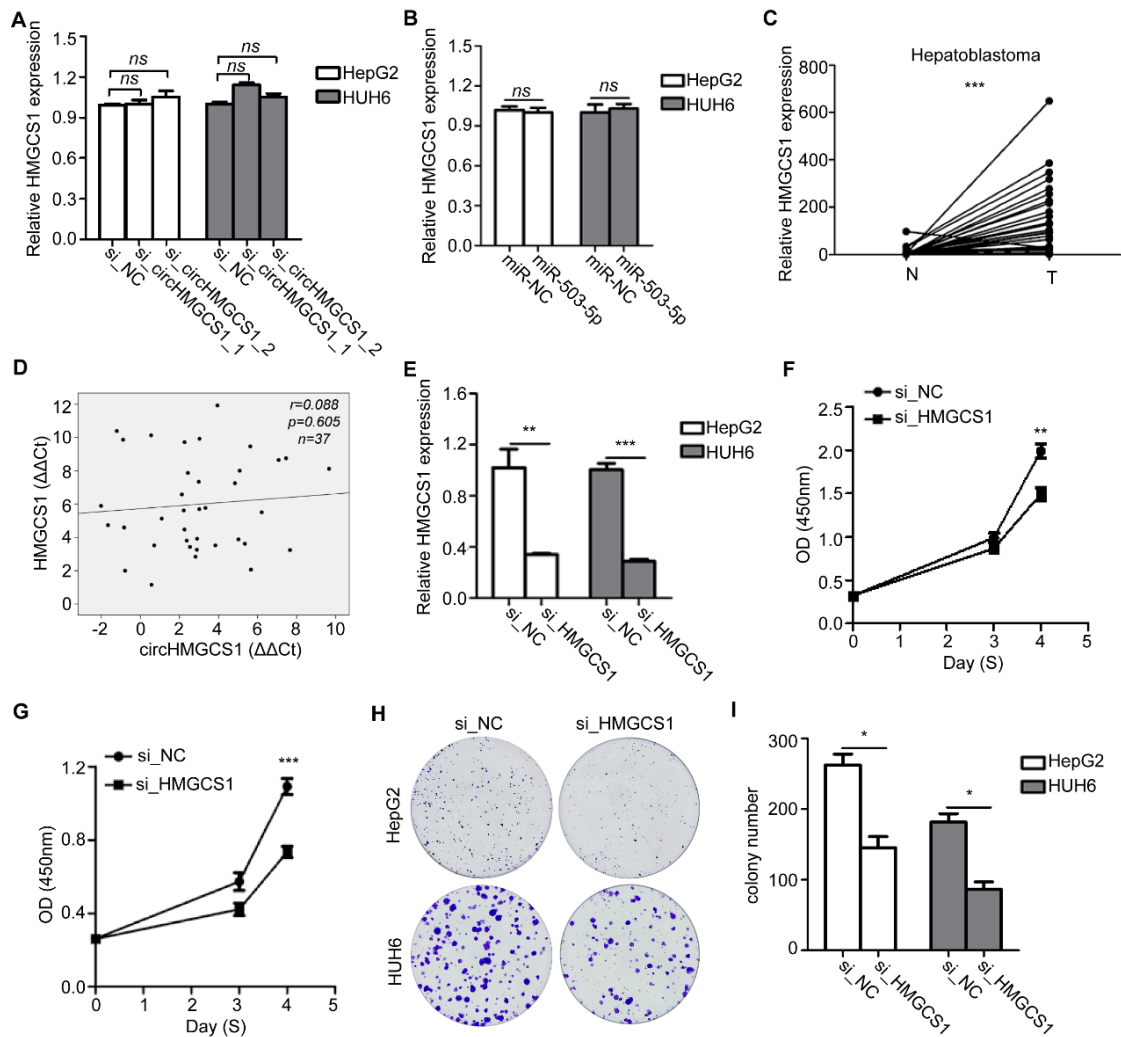

**Figure S3. The relationship between circHMGCS1 and HMGCS1.** (A) qRT-PCR assays were performed to detect the expression level of HMGCS1 in siRNA transfected HepG2 and HUH6 cells (one-way analysis of variance, Dunnett's test). (B) qRT-PCR assays were performed to detect the expression level of HMGCS1 in miR-503-5p transfected HepG2 cells and HUH6 cells (independent-samples t test). (C) The mRNA level of HMGCS1 in HB tissues was detected by qRT-PCR (paired samples t-test). (D) The correlation between circHMGCS1 and HMGCS1 was

analysed by Pearson correlation confidences. (E) The interference efficiency of siHMGCS1 were detected by qRT-PCR(independent-samples t-test). (F-I) The effect of HMGCS1 knockdown on cell proliferation was detected by CCK8 assays (F and G) and colony formation assay (H-I) ( independent-samples t-test). \* $p < 0.05$ , \*\* $p < 0.01$ , \*\*\* $p < 0.001$ .

**Figure S4:**

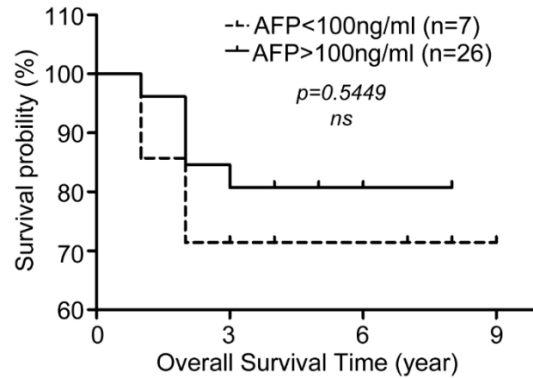

**Figure S4** Kaplan-Meier’s analyses of correlations between AFP level at diagnosis and OS of 33 HB patients (log-rank test).

**Figure S5:**

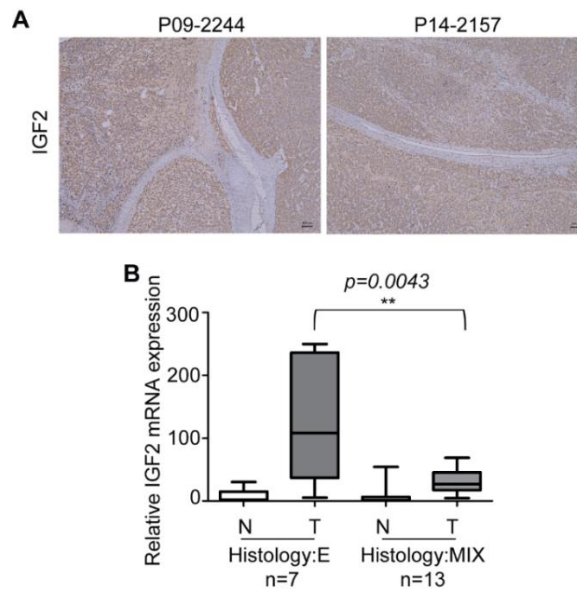

**Figure S5** The expression pattern of IGF2 in HB tissues. (A) IHC staining of IGF2 in HB tissue sections. (B) IGF2 expression was detected by qRT-PCR, and IGF2 expression was higher in Hepatoblastoma (epithelial ) than that in Hepatoblastoma mixed epithelial and mesenchymal (independent-samples t test).

## Supplementary Tables

### Supplementary Table 1 clinical patients information.

| Sample | Patient Number | Admission time | Sex | Age at diagnosis (month) | AFP at diagnosis (ng/ml) | Histology | PRETEXT | Tumor Size (cm <sup>3</sup> ) | Metastasis | AFP at Final test | Event | Detection Method | Pathological section number |
|--------|----------------|----------------|-----|--------------------------|--------------------------|-----------|---------|-------------------------------|------------|-------------------|-------|------------------|-----------------------------|
| S1     | 291465         | 20170408       | M   | 20                       | 1094.3                   | MIX       | I       | 1080                          | NO         | NA                | NA    | qPCR             |                             |
| S2     | 293467         | 20170428       | F   | 20                       | 26243.2                  | MIX       | III     | 1080                          | NO         | 5.92 (201780418)  | NA    | qPCR             |                             |
| S3     | 298082         | 20170614       | F   | 18                       | 3330.1                   | NA        | III     | 556.79925                     | NO         | 9.06 (20180312)   | NA    | qPCR             |                             |
| S4     | 318998         | 20180104       | M   | 77                       | >120000                  | E         | III     | 480                           | NO         | 133.05 (20180531) | NA    | qPCR             |                             |
| S5     | 325997         | 20180317       | M   | 19                       | 88178.5                  | MIX       | I       | 1950                          | NO         | 9.78 (20180606)   | NA    | qPCR             |                             |
| S6     | 299192         | 20170524       | M   | 27                       | >120000                  | NA        | III     | 906.40431                     | YES        | 1.35(20180607)    | NA    | qPCR             |                             |
| S7     | 300376         | 20170708       | M   | 30                       | 1394.16                  | E         | II      | 720                           | NO         | 2.14 (20180423)   | NA    | qPCR             |                             |
| S8     | 299060         | 20170623       | F   | 41                       | >120000                  | MIX       | II      | 960                           | YES        | 40.65 (20180604)  | NA    | qPCR             |                             |
| S9     | 305761         | 20170819       | M   | 29                       | 165.1                    | MIX       | II      | 60                            | YES        | 1.11 (20180425)   | NA    | qPCR             |                             |
| S10    | 311532         | 20171018       | F   | 17                       | 12639.6                  | MIX       | II      | 532.44                        | NO         | 7.32 (20180326)   | NA    | qPCR             |                             |
| S11    | 236250         | 20150629       | M   | 88                       | >3000                    | NA        | III-IV  | 299.88                        | NO         | NA                | Death | qPCR             |                             |
| S12    | 245611         | 20151023       | F   | 94                       | 11044                    | MIX       | III-IV  | 720.00                        | NO         | 1.25 (20180605)   | Alive | qPCR             |                             |
| S13    | 241094         | 20150822       | M   | 88                       | 2882.96                  | NA        | III-IV  | 299.88                        | NO         | 349.32 (20160615) | Alive | qPCR             |                             |
| S14    | 242769         | 20150914       | M   | 37                       | 23098.5                  | MIX       | I       | 1080                          | NO         | 2.19 (20180319)   | NA    | qPCR             |                             |
| S15    | 243878         | 20150928       | M   | 37                       | 126000                   | NA        | III     | 445.718                       | NO         | 1.18 (20180416)   | Alive | qPCR             |                             |
| S16    | 271526         | 20160822       | F   | 39                       | 1691.93                  | NA        | III     | 1042.81814                    | NO         | NA                | NA    | qPCR             |                             |
| S17    | 247365         | 20151114       | M   | 42                       | 2753.13                  | NA        | III-IV  | 240                           | NO         | 4.19 (20180531)   | Alive | qPCR             |                             |
| S18    | 290459         | 20151224       | M   | 30                       | 35986                    | E         | I-II    | 45.325                        | NO         | 5.24 (20181205)   | NA    | qPCR             |                             |
| S19    | 290610         | 20151226       | M   | 34                       | 52.98                    | E         | NA      | 675.50616                     | NO         | NA                | NA    | qPCR             |                             |
| S20    | 262581         | 20160121       | M   | 86                       | 120000                   | NA        | III-IV  | 725.3316                      | YES        | 1.24(20160429)    | NA    | qPCR             |                             |
| S21    | 253463         | 20160202       | M   | 66                       | 3064.24                  | E         | NA      | 480                           | NO         | 348.63 (20160216) | NA    | qPCR             |                             |
| S22    | 253871         | 20160211       | F   | 50                       | 9.8                      | E         | III     | 1371.04                       | NO         | 1.90 (20180315)   | NA    | qPCR             |                             |
| S23    | 253883         | 20160211       | F   | 32                       | 1036.51                  | NA        | IV      | 1442.65023                    | NO         | 4.81 (20180314)   | NA    | qPCR             |                             |
| S24    | 259035         | 20160414       | F   | 48                       | 3.71                     | MIX       | NA      | 1512                          | NO         | 4.38 (20180316)   | NA    | qPCR             |                             |
| S25    | 261638         | 20160514       | M   | 32                       | 8.38                     | NA        | III     | 1128.8816                     | YES        | 2.13 (20180118)   | NA    | qPCR             |                             |
| S26    | 264135         | 20160610       | M   | 28                       | 44.7                     | NA        | NA      | 1016.64158                    | NO         | NA                | Death | qPCR             |                             |
| S27    | 267627         | 20160716       | M   | 34                       | 2076.16                  | E         | NA      | 576.238551                    | NO         | NA                | NA    | qPCR             |                             |
| S28    | 268381         | 20160723       | M   | 38                       | 83080.4                  | NA        | III-IV  | 1016.64158                    | NO         | 3.17 (20180409)   | NA    | qPCR             |                             |
| S29    | 271332         | 20160820       | F   | 27                       | 1364.47                  | MIX       | NA      | 727.25255                     | NO         | 5.99 (20180409)   | NA    | qPCR             |                             |
| S30    | 272355         | 20160906       | M   | 25                       | 1293.17                  | NA        | NA      | 114.9812                      | NO         | 1.92 (20170710)   | NA    | qPCR             |                             |
| S31    | 276132         | 20161015       | M   | 29                       | 1088.14                  | MIX       | NA      | 92.736                        | NO         | 1.47 (20180103)   | NA    | qPCR             |                             |
| S32    | 277441         | 20161029       | M   | 54                       | >120000                  | MIX       | I       | 1302.32448                    | NO         | 2.43 (20180205)   | NA    | qPCR             |                             |
| S33    | 279778         | 20161109       | M   | 23                       | 1464.89                  | NA        | NA      | 2115.34158                    | NO         | NA                | NA    | qPCR             |                             |
| S34    | 290534         | 20161203       | M   | 121                      | 3332.98                  | NA        | NA      | 664.44                        | NO         | 0.67 (20180418)   | NA    | qPCR             |                             |
| S35    | 290824         | 20170401       | F   | 15                       | 83927                    | NA        | NA      | 139.99314                     | NO         | 432.52 (20180621) | NA    | qPCR             |                             |
| S36    | 291465         | 20170408       | M   | 20                       | 1742                     | MIX       | I       | 821.24394                     | YES        | 6.28 (20180403)   | NA    | qPCR             |                             |
| S37    | 291967         | 20170410       | F   | 41                       | 25944.3                  | NA        | IV      | 1793.464                      | NO         | 4.00 (20180226)   | NA    | qPCR             |                             |
| S38    | 229082         | 20150328       | M   | 20                       | 45.25                    | MIX       | II-III  | 964.8608                      | NO         | 2.51 (20180317)   | Alive | ISH and IHC      | P15-966A                    |
| S39    | 163497         | 20130924       | M   | 48                       | >3000                    | E         | III-IV  | 2288.286                      | NO         | 894.61            | Alive | ISH and IHC      | P13-255B                    |
| S40    | 242768         | 20150914       | M   | 4.5                      | 23908.5                  | MIX       | I       | 708.084                       | NO         | 2.00 (20180319)   | Alive | ISH and IHC      | P15-2989A                   |
| S41    | 226740         | 20150225       | M   | 30                       | >3000                    | MIX       | I       | 435.1994                      | NO         | 1.01 (20151116)   | Alive | ISH and IHC      | P15-587A                    |
| S42    | 234511         | 20150606       | M   | 27                       | >3000                    | MIX       | I-II    | 200                           | NO         | 1.10 (20170711)   | Alive | ISH and IHC      | P15-1760A                   |
| S43    | 231145         | 20150425       | F   | 14                       | 2996.21                  | NA        | III     | 1429.25598                    | NO         | 1.95 (20171225)   | Alive | ISH and IHC      | P15-1274                    |
| S44    | 097948         | 20090818       | F   | 11                       | 3.74                     | MIX       | NA      | 985.536                       | NO         | 1.16 (20100920)   | Alive | ISH and IHC      | P09-1761                    |
| S45    | 151638         | 20120628       | F   | 9                        | >3000                    | E         | III     | 597.702                       | NO         | >3000 (20120711)  | Death | ISH and IHC      | P12-1406                    |
| S46    | 149863         | 20120429       | M   | 6                        | >3000                    | MIX       | III-IV  | 640.32                        | NO         | 2.03 (20130925)   | Alive | ISH and IHC      | P12-201A                    |
| S47    | 117479         | 20101009       | F   | 48                       | 1210                     | E         | NA      | 118.8                         | NO         | 0.71 (20160506)   | Alive | ISH and IHC      | P10-2165                    |
| S48    | 109786         | 20100514       | M   | 15                       | 1210000ng                | NA        | IV      | NA                            | NA         | 5.01 (20110224)   | Alive | ISH and IHC      | P10-985                     |
| S49    | 133632         | 20110719       | F   | 48                       | 2.38                     | E         | II      | 185.724                       | NO         | 1.03 (20120521)   | Alive | ISH and IHC      | P11-1967B                   |
| S50    | 238248         | 20150721       | F   | 21                       | 10931.7                  | MIX       | III     | 24.19                         | NO         | 3.75 (20180321)   | Alive | ISH and IHC      | P15-2330A                   |
| S51    | 226975         | 20150228       | M   | 19                       | >3000                    | MIX       | III-IV  | 309.514                       | NO         | 3.84 (20150804)   | Alive | ISH and IHC      | P15-626A                    |
| S52    | 229142         | 20150329       | F   | 20                       | >3000                    | MIX       | III     | 650.87                        | NO         | 2.14 (20180407)   | Alive | ISH and IHC      | P15-1020                    |
| S53    | 236250         | 20150629       | M   | 48                       | >3000                    | NA        | III-IV  | 291                           | YES        | 349.32            | Death | ISH and IHC      | P15-1978                    |
| S54    | 165739         | 20121227       | M   | 24                       | >3000                    | E         | III     | 722.304                       | NO         | 0.95 (20170717)   | Alive | ISH and IHC      | P12-3391                    |
| S55    | 176888         | 20130624       | M   | 16                       | >3000                    | E         | NA      | NA                            | NO         | >3000(20130621)   | Alive | ISH and IHC      | P13-1588                    |
| S56    | 209061         | 20140705       | M   | 8                        | 918.74                   | E         | II      | 277.4772                      | NO         | 1.24 (20181026)   | Alive | ISH and IHC      | P14-2157                    |
| S57    | 210766         | 20140725       | F   | 18                       | >3000                    | MIX       | I-II    | 105.722412                    | NO         | 1.99 (20141229)   | Alive | ISH and IHC      | P14-2366                    |
| S58    | 156095         | 20120727       | M   | 18                       | 33.85                    | E         | IV      | 853.86                        | NO         | 10.88 (20130506)  | Alive | ISH and IHC      | P12-2009                    |
| S59    | 153654         | 20120625       | M   | 9                        | 6.49                     | E         | IV      | 252.992                       | NO         | 6.49 (20121031)   | Death | ISH and IHC      | P12-1602                    |
| S60    | 100472         | 20090524       | F   | 23                       | 1865.49                  | MIX       | NA      | NA                            | NA         | 1.11 (20111115)   | Alive | ISH and IHC      | P09-2244                    |
| S61    | 194371         | 20140303       | F   | 4.5                      | >3000                    | MIX       | IV      | 755.969456                    | NO         | 2.95 (20170515)   | Alive | ISH and IHC      | P14-567                     |
| S62    | 124565         | 20110225       | F   | 72                       | >1210.00                 | NA        | IV      | 93.95                         | NO         | >1210(20121123)   | Death | ISH and IHC      | P11-439                     |
| S63    | 124142         | 20100520       | F   | 20                       | 9.42                     | NA        | II      | 688.7                         | NO         | 11.71 (20111120)  | Alive | ISH and IHC      | P11-1307                    |
| S64    | 200832         | 20140321       | M   | 15                       | >3000                    | MIX       | III-IV  | 1095.12                       | NO         | >3000(20150915)   | Death | ISH and IHC      | P14-793                     |

NA means no data; M means male; F means female; MIX means mixed epithelial and mesenchymal; E means epithelial.

## Supplementary Table 2 Primers and RNA sequences used in this study

**List of oligonucleotide sequences**

5'→ 3'

**qRT-PCR**

circHMGCs1-F-1 TCTAGCTCGGATGTTGCTGA  
 circHMGCs1-R-1 TCAGGCTTGAAAAATCATAGGC  
 has\_circ\_0003265-F-1 TGTGCAATGACCGTGAACCTG  
 has\_circ\_0003265-R-1 CAGTCTTTCTGCTCCTTAGTCCA  
 has\_circ\_0002085-F-1 ACAGAAAAACAGTCTGTGGAGAG  
 has\_circ\_0002085-R-1 TCAATTGGACTTTTCCCAAATGCT  
 has\_circ\_0004365-F-1 TTCTCGGAACAGGACCAAGT  
 has\_circ\_0004365-R-1 ACGTTGGGGTTGAAAGAGCA  
 has\_circ\_0072995-F-1 TCCAGCGGTGCAGAAACTG  
 has\_circ\_0072995-R-1 CCCGGGAGACACAAGAAGAAC  
 has\_circ\_0072992-F-1 TGCTCTAGAGTGGACTGTGT  
 has\_circ\_0072992-R-1 ATGTGCTGATGAGATCCGT  
 has\_circ\_0007294-F-1 GCCAGAGTGTAAACAGAAAAGGG  
 has\_circ\_0007294-R-1 TCGTACAACATCCACCTTTCCA  
 has\_circ\_0077387-F-1 TCCTAAGACTCGAAGGCAGC  
 has\_circ\_0077387-R-1 CTGTGCTTCAAGGGCTCATC  
 has\_circ\_0067745-F-1 GAGCTGAGACGCAATGGTTC  
 has\_circ\_0067745-R-1 TCCAGCTGGGAGTTAATTGTGT  
 IGF2-F CTTGGACTTTGAGTCAAATTGG  
 IGF2-R GGTCTGCCAATTACATTTCA  
 miR-503-5p-RT GTCGTATCCAGTGCAGGGTCCGAGGTATTGCGACTGGATACGACCTGCAG  
 miR-503-5p-F CGTAGCAGCGGGGAACAGTT  
 miR-503-5p-R AGTGCAGGGTCCGAGGTATT  
 miR-490-5p-RT GTCGTATCCAGTGCAGGGTCCGAGGTATTGCGACTGGATACGACACCCAC  
 miR-490-5p-F CGCGCCATGGATCTCCAG  
 miR-490-5p-R AGTGCAGGGTCCGAGGTATT  
 miR-615-3p-RT GTCGTATCCAGTGCAGGGTCCGAGGTATTGCGACTGGATACGACAAAGAGG  
 miR-615-3p-F CGTCCGAGCCTGGGTCTC  
 miR-615-3p-R AGTGCAGGGTCCGAGGTATT  
 U6-RT AAAAAATATGGAACGCTCACGAATTTG  
 U6-F GTGCTCGCTTTCGGCAGCACATATAC  
 U6-R AAAAAATATGGAACGCTCACGAATTTG  
 GLS-F CTGGAGGAAGGTTGCAGATTA  
 GLS-R GAATGCCTCTGTCCATCTACTG  
 PLAG1-F ATCACCTCCATACACACGACC  
 PLAG1-R AGCTTGGTATTGTAGTTCTTGGC  
 BCL2-F TTGCCAGCCGGAACCTATG  
 BCL2-R GAAAGCGACCCAGCAATGATA  
 E2F3-F AGAAAGCGGTCTCAGTACCT  
 E2F3-R TGGACTTCGTAGTGCAGCTCT  
 IGF1R-F TCGACATCCGCAACGACTATC  
 IGF1R-R CCAGGGCGTAGTTGTAGAAGAG  
 VEGFA-F AGGGCAGAATCATCACGAAGT  
 VEGFA-R GGGTCTCGATTGGATGGCA  
 HMGCs1-F GATGTGGGAATTGTTGCCCTT  
 HMGCs1-R ATGTCTCTGTTCCAACTTCCAG  
 IGF1-F GCTCTTCAAGTTCGTGTGTGGA  
 IGF1-R GCCTCCTTAGATCACAGCTCC  
 18S-F cagccaccgagattgagca  
 18S-R tagtagcgaaggcggtgtg  
 GAPDH-F TGTGGCCATCAATGACCCCTT  
 GAPDH-R CTCCACGACGTAAGTACAGCG  
 U1-F GGCTTGTGAACTTG  
 U1-R CGCTACCATAAATAATACGC

**luciferase PCR**

luciferase-circHMGCs1-F CCGCTCGAGGGCTTCGTGGGACACATATGCAA  
 luciferase-circHMGCs1-R ATAAAGAAATGCGGCCGCCAAAGGCTTCCAGGCCACTA  
 luciferase-IGF2-3'UTR(500-849)-F TGAAGAACGAGCAGTAATTTCTAGGCGATCGCTCGAGACCCCCCTCTTTCTCTTCCCTT  
 luciferase-IGF2-3'UTR(500-849)-R AATGAAAAATAAGATATTTTATTGCGGCCAGCGGCCGCTTAGGATGGGAATTGAGATGT  
 luciferase-IGF2-3'UTR(2617-2916)-F TGAAGAACGAGCAGTAATTTCTAGGCGATCGCTCGAGGCCCACTGAGCCCCCTTGGAGAAC  
 luciferase-IGF2-3'UTR(2617-2916)-R AATGAAAAATAAGATATTTTATTGCGGCCAGCGGCCCAAGATGTACCCGAGGGAGAGG

**siRNA**

si\_NC-S sense (5'-3')  
 si\_NC-AS UUCUCCGAACGUGUCACGUTT  
 si\_circHMGCs1-1-S ACGUGACACGUUCGGAGAATT  
 si\_circHMGCs1-1-AS UGGAAGCCUUUGGGGCUUCGUdTdT  
 si\_circHMGCs1-2-S ACGAAGCCCAAAGGCUUCCAdTdT  
 si\_circHMGCs1-2-AS GCCUGGAAGCCUUUGGGGCUUdTdT  
 siHMGCs1-S AAGCCCAAAGGCUUCCAGGCdTdT  
 siHMGCs1-AS GCACAGCUGCUGUCUUAATT  
 UUGAAGACAGCAGCUGUGCTT

**shRNA**

sh\_NC plvx-shRNA1  
 sh\_circHMGCs1 GGATCC TGAAGCCTTTGGGGCTTCGT CTCGAG ACGAAGCCCAAAGGCTTCCA TTTTTGAATTC

**Primers for overexpression plasmid**

circHMGCs1-oe-F cgGAATTCGAAATATGCTATCTTACAGGGCTTCGTGGGACACATATGCA  
 circHMGCs1-oe-R cgGGATCCTCAAGAAAAAATATTTCCAAAGGCTTCCAGGCCACTAT

**circHMGCs1 ISH probe**

5'-DIG-ATGTGTCCCACGAAAGCCCAAAGGCTTCCAGGCCA-3'

**List of Antibodies**

anti-IGF2 abcam, ab9574  
 anti-IGF1R abcam, ab182408  
 anti-Akt cell signaling technology, 9272  
 anti-p-Akt(S473) cell signaling technology, 4060  
 anti-p-Akt(T308) cell signaling technology, 2965  
 anti-BCL2 cell signaling technology, 2872  
 anti-VEGFA abcam, ab1316  
 anti-GLS abcam, ab156876

**Supplementary Table 3 experimentally validated target gene of miR-503-5p extracted from the literature.**

| <b>Name</b>             | <b>Reference(Pubmed ID)</b>                                |
|-------------------------|------------------------------------------------------------|
| LARP1                   | 29969631                                                   |
| IGF1R                   | 29917206/ 24636986 /24378652 /28810619 /27366090 /18986336 |
| HNRNPA1                 | 29872500                                                   |
| VEGFA                   | 27619772 /26268439 /23352645 /23352645                     |
| Apelin                  | 29800588                                                   |
| cyclin D1               | 29571017/ 28602785/23731275 /19538740 /26882816            |
| PRKACA                  | 29568867                                                   |
| D52 like 2              | 29375699                                                   |
| PI3K p85                | 29327155/28900284 /24550137                                |
| WEE1                    | 29019284                                                   |
| E2F3                    | 23967867/26722476 / 29169421                               |
| BCL2                    | 24636986/23355742/28343379/23856992 /23355742              |
| CDKN2A                  | 28942143                                                   |
| ALK                     | 28915608                                                   |
| PDCD4                   | 28912531                                                   |
| eIF4G                   | 28599480                                                   |
| CD40                    | 28566713                                                   |
| PUMA                    | 28423513                                                   |
| Smurf1                  | 28341855                                                   |
| EIF4E                   | 27840964                                                   |
| insulin receptor (INSR) | 27829550                                                   |
| ZNF217                  | 27539783/27267060                                          |
| c-myb                   | 26768615                                                   |
| Apelin-13.              | 26756969                                                   |
| FGF2                    | 26461038/23352645                                          |
| RNF31                   | 26231797                                                   |
| PRMT1                   | 26163260                                                   |
| CCND1                   | 26047605                                                   |
| DDHD2                   | 25630602                                                   |
| L1CAM                   | 25536034                                                   |
| FBXW7                   | 25269767                                                   |
| Smurf2                  | 24554769                                                   |
| IKK- $\beta$            | 24550137                                                   |
| FANCA                   | 24486548                                                   |
| RANK                    | 23821519                                                   |
| CD40                    | 22429276                                                   |
| CUGBP1                  | 22072795                                                   |
| Cdc25A                  | 20462953                                                   |
| Cyclin E                | 26882816/ 22814423                                         |
